# Supplementary material for: Investigation of some benzoquinazoline and quinazoline derivatives as novel inhibitors of HCV-NS3/4A protease: biological, molecular docking and QSAR studies
Source: Royal Society of Chemistry journal article supplement (doi:10.1039/d0ra05604a), 2020-01-01
Supplement: d0ra05604a1.pdf [file d0ra05604a1.pdf]

**S1 Table:** Dataset of training set of the HCV NS3/4A serine protease inhibitors consist of synthesized compounds with biological activity values ( $pIC_{50}$ ), predicted  $pIC_{50}$  and predicted Z-score.

| No. | Structure                                                                                              | Molecule      | $pIC_{50}$ | PRED | Z-SCORE | Ref. |
|-----|--------------------------------------------------------------------------------------------------------|---------------|------------|------|---------|------|
| 1   | 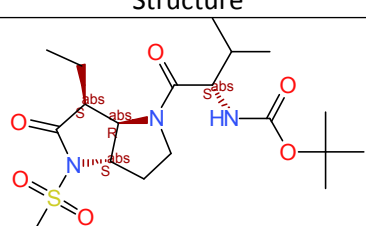<br>this enantiomer   | CHEMBL419930  | 4.66       | 4.65 | 0.01    | [28] |
| 2   | <br>this enantiomer   | CHEMBL4107186 | 8.3        | 8.38 | 0.15    | [29] |
| 3   | <br>this enantiomer  | CHEMBL3978278 | 8.15       | 7.74 | 0.71    | [29] |
| 4   | <br>this enantiomer | CHEMBL3972861 | 7.62       | 8.16 | 0.94    | [29] |
| 5   | <br>this enantiomer | CHEMBL3969256 | 8.55       | 7.29 | 2.19    | [29] |
| 6   | <br>racemate        | CHEMBL3966786 | 6.4        | 7.23 | 1.45    | [29] |

|    |                                                                                     |               |      |      |      |      |
|----|-------------------------------------------------------------------------------------|---------------|------|------|------|------|
| 7  | 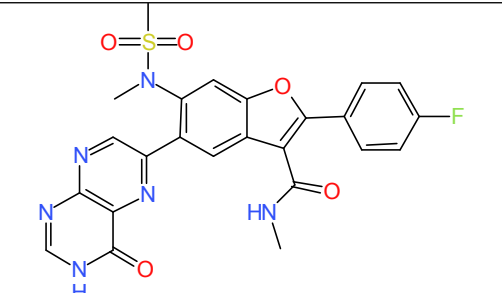   | CHEMBL3960822 | 6.25 | 6.96 | 1.23 | [29] |
| 8  |    | CHEMBL3960796 | 7.98 | 7.88 | 0.18 | [29] |
| 9  |    | CHEMBL3959793 | 8.3  | 7.86 | 0.76 | [29] |
| 10 |   | CHEMBL3957232 | 8.52 | 8.11 | 0.71 | [29] |
| 11 |  | CHEMBL3949897 | 8.2  | 7.54 | 1.15 | [29] |
| 12 |  | CHEMBL3936097 | 7.46 | 7.72 | 0.45 | [29] |
| 13 |  | CHEMBL3932292 | 8.15 | 8.07 | 0.14 | [29] |

|    |  |               |      |      |      |      |
|----|--|---------------|------|------|------|------|
| 14 |  | CHEMBL3925629 | 7.45 | 8.35 | 1.56 | [29] |
| 15 |  | CHEMBL3913311 | 5.77 | 6.91 | 1.97 | [29] |
| 16 |  | CHEMBL3913046 | 7.11 | 6.97 | 0.24 | [29] |
| 17 |  | CHEMBL3910003 | 8.43 | 7.49 | 1.63 | [29] |
| 18 |  | CHEMBL3904432 | 6.89 | 6.48 | 0.71 | [29] |
| 19 |  | CHEMBL116118  | 4    | 4.32 | 0.55 | [28] |
| 20 |  | CHEMBL112200  | 4.57 | 4.65 | 0.14 | [28] |
| 21 |  | 9             | 5.04 | 4.58 | 0.8  |      |

|    |                                                                                     |    |      |      |      |  |
|----|-------------------------------------------------------------------------------------|----|------|------|------|--|
| 22 | 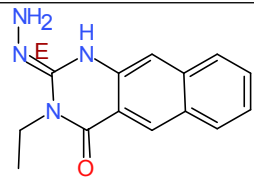   | 8  | 4.1  | 4.18 | 0.14 |  |
| 23 |    | 7  | 4.65 | 4.05 | 1.04 |  |
| 24 |    | 6  | 4.5  | 5.03 | 0.93 |  |
| 25 |    | 5  | 4.43 | 4.82 | 0.68 |  |
| 26 |   | 3  | 5.03 | 4.63 | 0.69 |  |
| 27 |  | 2  | 5.19 | 4.23 | 1.66 |  |
| 28 |  | 17 | 4.53 | 4.63 | 0.17 |  |
| 29 |  | 16 | 4.63 | 4.35 | 0.48 |  |
| 30 |  | 15 | 3.75 | 4.07 | 0.56 |  |
| 31 |  | 13 | 4.84 | 4.97 | 0.23 |  |

|    |                                                                                   |    |      |      |      |  |
|----|-----------------------------------------------------------------------------------|----|------|------|------|--|
| 32 | 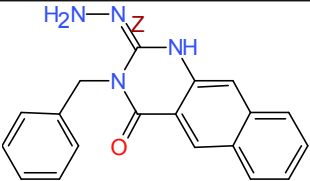 | 12 | 3.65 | 4.76 | 1.93 |  |
| 33 |  | 11 | 4.47 | 4.49 | 0.04 |  |



|   |                                                                                   |   |      |      |      |  |
|---|-----------------------------------------------------------------------------------|---|------|------|------|--|
| 9 | 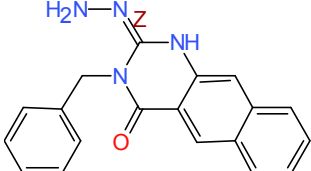 | 1 | 4.59 | 3.95 | 0.64 |  |
|---|-----------------------------------------------------------------------------------|---|------|------|------|--|

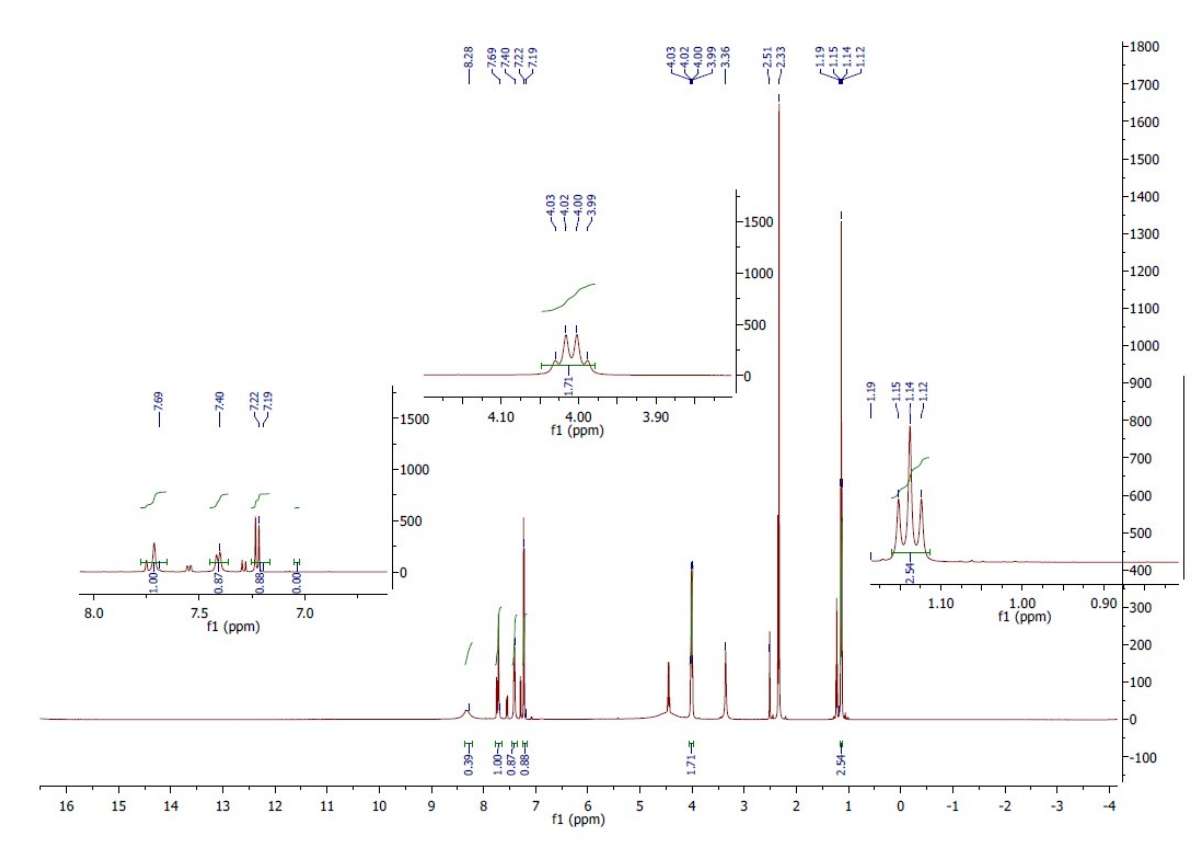

<sup>1</sup>H-NMR for compound 15

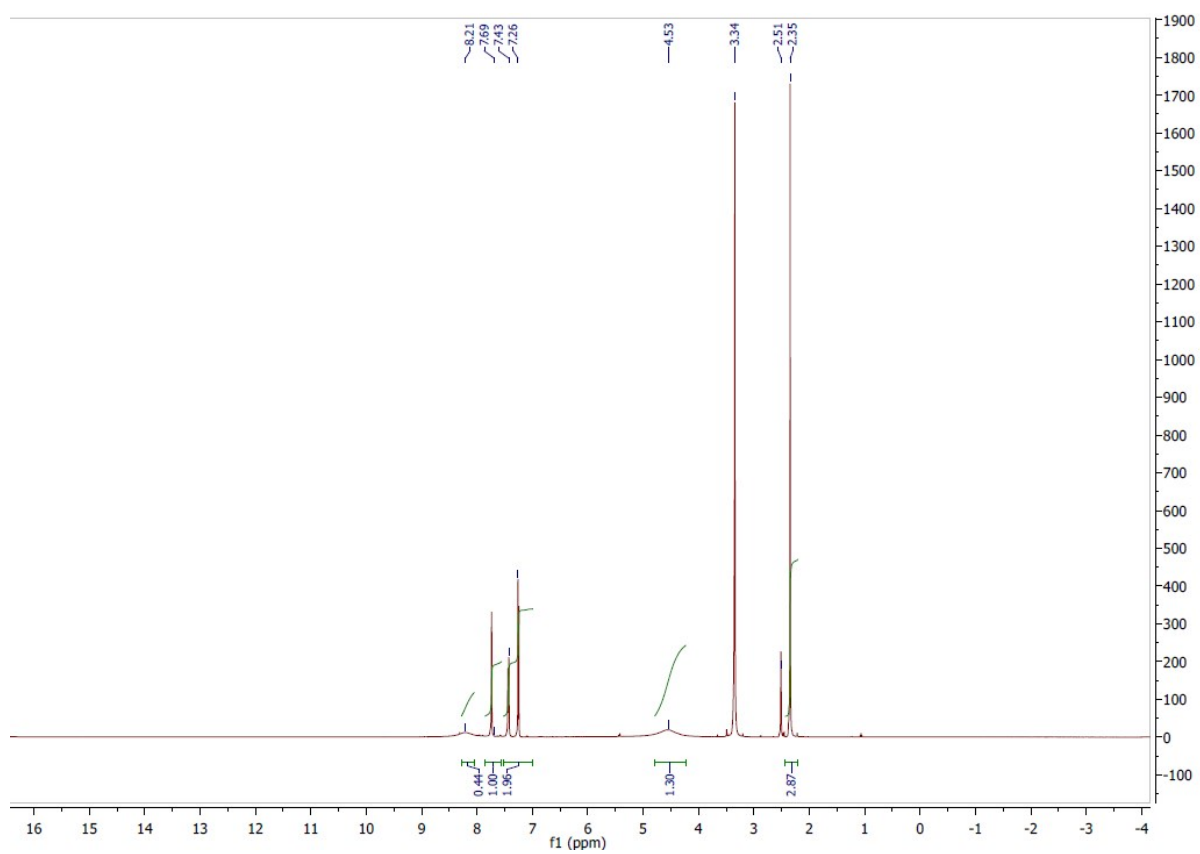

<sup>1</sup>H-NMR for compound 14



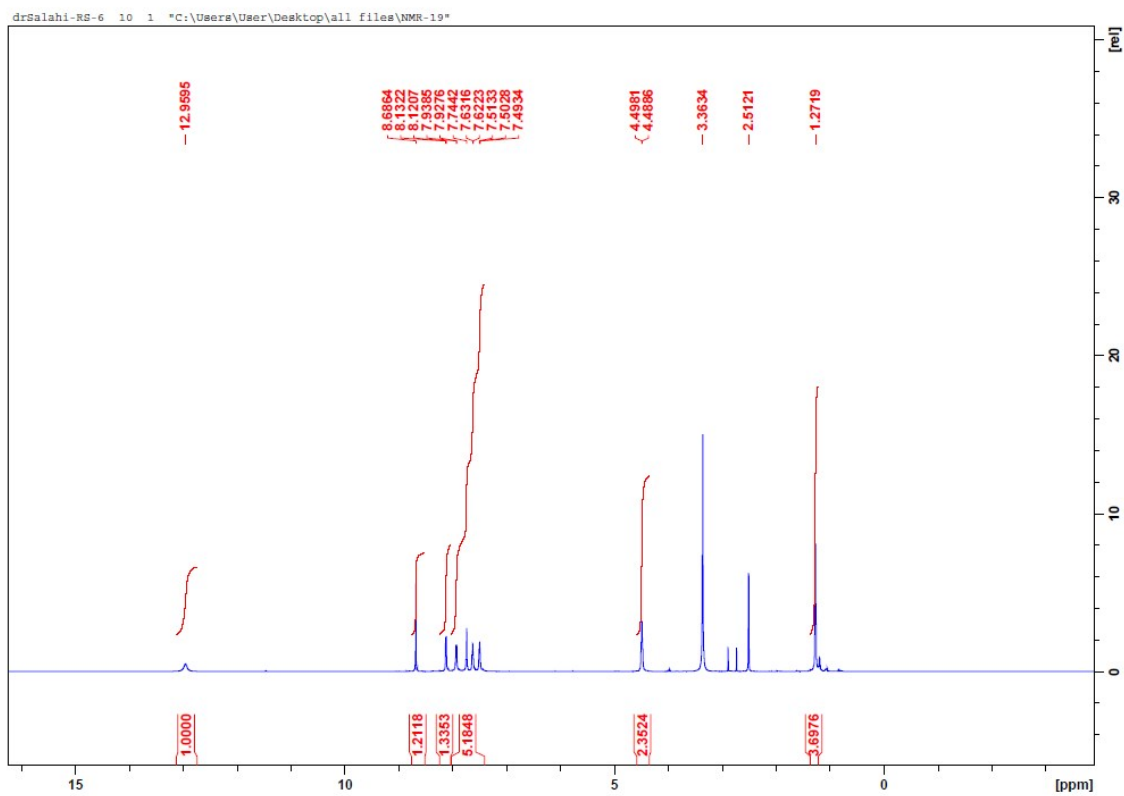

<sup>1</sup>H-NMR for compound 2

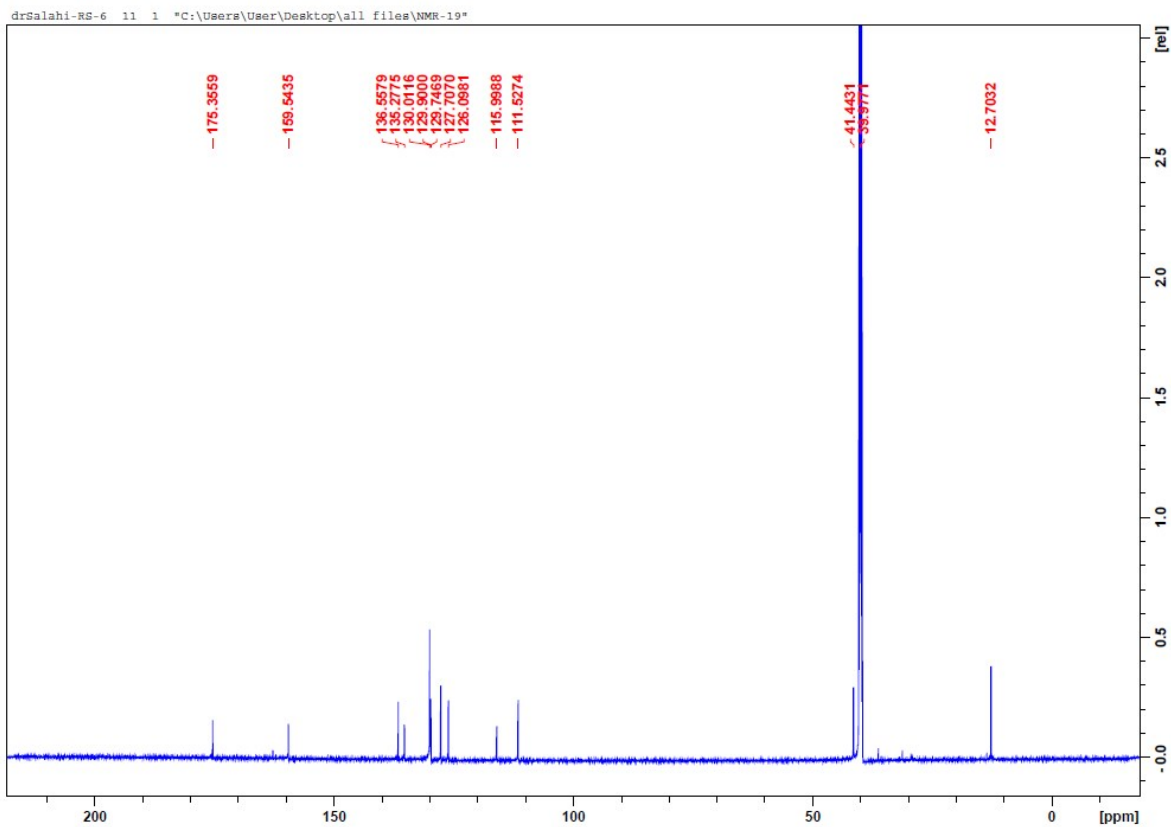

$^{13}\text{C}$ -NMR for compound 2

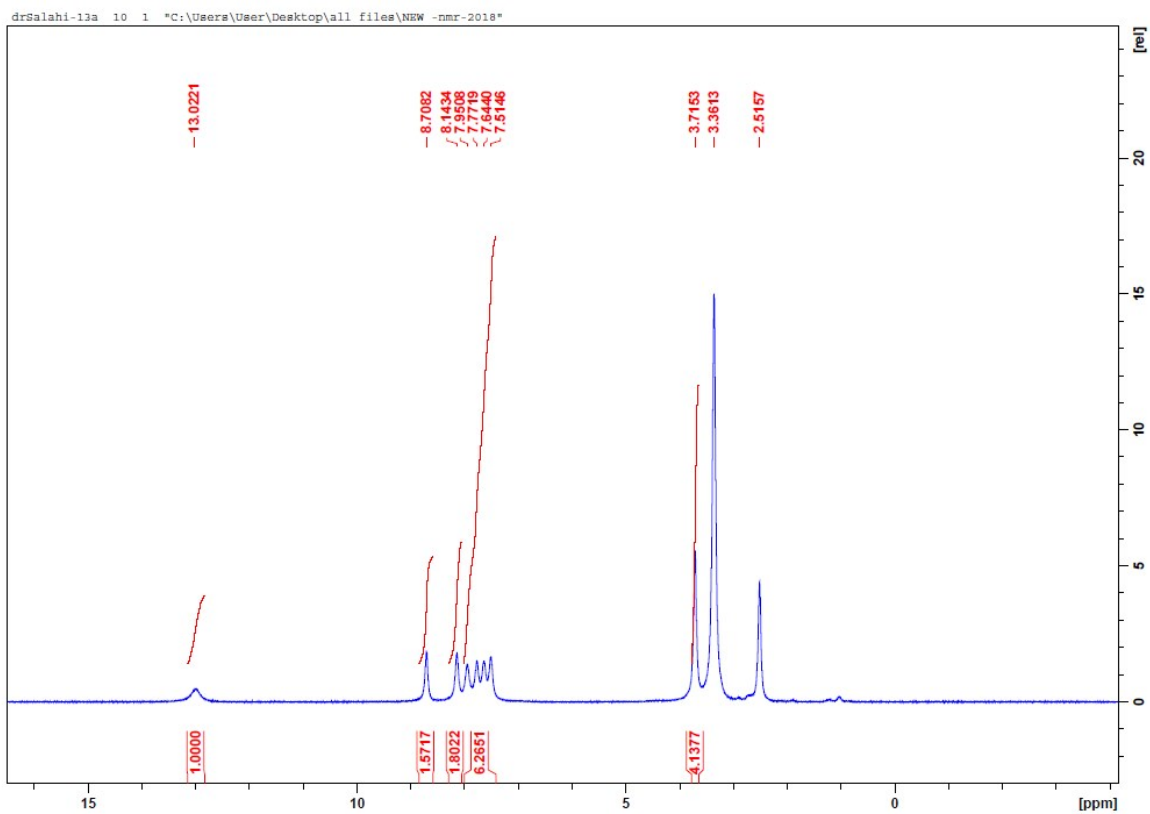

**$^1\text{H-NMR}$  for compound 1**
